# Supplementary material
Source: Research Square preprint supplement (doi:10.21203/rs.3.rs-10032196/v1)
Supplement: Supplementary file 1 [file a8c47584f41d437c496f9f9b.pdf]

# A survey of health professionals' PHL & beliefs & attitudes towards PCC

---

Start of Block: Participant Information Sheet

Q1 *Please take a moment to read through the* **Participant Information Sheet**

End of Block: Participant Information Sheet

---

Start of Block: Consent to participate

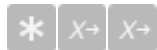

**Q2 Consent to participate**

**Do you agree with all the above and consent to participate in this research project?**

Yes (1)

No (0)

End of Block: Consent to participate

---

Start of Block: Participant inclusion / exclusion

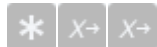

Q3 Which describes your primary health profession?

- General Practitioner (1)
  - Midwife (2)
  - Naturopath (3)
  - None of the above (4)
- 

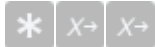

Q4 Have you been in clinical practice in Australia, in the last 12 months?

- Yes (1)
- No (0)

End of Block: Participant inclusion / exclusion

---

Start of Block: Demographics

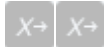

Q5 How long ago did you first qualify as a [\\${Q3/ChoiceGroup/SelectedChoices}](#)?

- Less than 5 years (1)
  - Between 5 and 10 years (2)
  - Between 11 and 15 years (3)
  - Between 16 and 20 years (4)
  - More than 21 years (5)
-

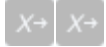

Q6 Which of the following best describes your clinical practice environment? (*Select all that apply*)

- I am in a clinical practice by myself (1)
  - I am in a clinical practice with other health professionals (1)
  - I am in a hospital setting (1)
  - Other [please describe] (1)
- 

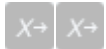

Q7 What is your gender?

- Woman (1)
  - Man (2)
  - Non-binary / gender diverse (3)
  - Prefer not to say (4)
  - My gender isn't listed. I identify as: [Please describe] (5)
- 

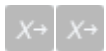

Q8 Which category below includes your age in years?

20 or younger (1)

21-29 (2)

30-39 (3)

40-49 (4)

50-59 (5)

60 or older (6)

End of Block: Demographics

---

Start of Block: Populations

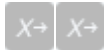

Q9 Which of the following populations does your health service provide for? (*Select all that apply*)

- Adult women (1)
  - Adult men (2)
  - Infants (3)
  - Children (4)
  - Adolescents (5)
  - Elderly (6)
  - Marginalised populations (7)
  - Indigenous peoples (8)
  - CALD communities (9)
  - Other populations not listed [Please describe] (10)
- 

*Display This Question:*

*If Which of the following populations does your health service provide for? (Select all that apply) =  
Adult women*

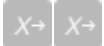

Q10 How frequently do adult women access your health service with the following reasons?

|                                                                                                                        | Rarely (1)            | About half the time<br>(2) | Most the time (3)     |
|------------------------------------------------------------------------------------------------------------------------|-----------------------|----------------------------|-----------------------|
| Reproductive health care (e.g., for PCOS, PMS, endometriosis, heavy menstrual bleeding, menopause transition etc.) (1) | <input type="radio"/> | <input type="radio"/>      | <input type="radio"/> |
| Sexual health care (e.g., screening, prevention, and treatment of STIs) (2)                                            | <input type="radio"/> | <input type="radio"/>      | <input type="radio"/> |
| Contraceptive advice and/or prescription (3)                                                                           | <input type="radio"/> | <input type="radio"/>      | <input type="radio"/> |
| Accessing Assisted Reproductive Technology (4)                                                                         | <input type="radio"/> | <input type="radio"/>      | <input type="radio"/> |
| Planning to conceive in the next 3 months (5)                                                                          | <input type="radio"/> | <input type="radio"/>      | <input type="radio"/> |
| Planning to conceive in the next 3 months to two years (6)                                                             | <input type="radio"/> | <input type="radio"/>      | <input type="radio"/> |
| Wanting to improve fertility (e.g., egg quality) (7)                                                                   | <input type="radio"/> | <input type="radio"/>      | <input type="radio"/> |
| Pregnancy support (8)                                                                                                  | <input type="radio"/> | <input type="radio"/>      | <input type="radio"/> |
| Postnatal support (9)                                                                                                  | <input type="radio"/> | <input type="radio"/>      | <input type="radio"/> |
| Seeking assistance with another health condition (10)                                                                  | <input type="radio"/> | <input type="radio"/>      | <input type="radio"/> |

Display This Question:

If Which of the following populations does your health service provide for? (Select all that apply) = Adolescents

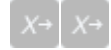

Q11 How frequently do adolescent women access your health service with the following reasons?

|                                                                                             | Rarely (1)            | About half the time (2) | Most the time (3)     |
|---------------------------------------------------------------------------------------------|-----------------------|-------------------------|-----------------------|
| Reproductive health care (e.g., for PCOS, PMS, endometriosis, heavy menstrual bleeding) (1) | <input type="radio"/> | <input type="radio"/>   | <input type="radio"/> |
| Sexual health care (e.g., screening, prevention, and treatment of STIs) (2)                 | <input type="radio"/> | <input type="radio"/>   | <input type="radio"/> |
| Contraceptive advice and prescription (3)                                                   | <input type="radio"/> | <input type="radio"/>   | <input type="radio"/> |
| Planning to conceive in the next 3 months (4)                                               | <input type="radio"/> | <input type="radio"/>   | <input type="radio"/> |
| Planning to conceive in the next 3 months to two years (5)                                  | <input type="radio"/> | <input type="radio"/>   | <input type="radio"/> |
| Is pregnant (6)                                                                             | <input type="radio"/> | <input type="radio"/>   | <input type="radio"/> |
| Is in the antenatal and postpartum period (7)                                               | <input type="radio"/> | <input type="radio"/>   | <input type="radio"/> |
| Seeking assistance with another health condition (8)                                        | <input type="radio"/> | <input type="radio"/>   | <input type="radio"/> |

Display This Question:

If Which of the following populations does your health service provide for? (Select all that apply) = Adult men

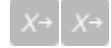

Q12 How frequently do adult men access your health service with the following reasons?

|                                                                                                                           | Rarely (1)            | About half the time (2) | Most of the time (3)  |
|---------------------------------------------------------------------------------------------------------------------------|-----------------------|-------------------------|-----------------------|
| Reproductive health care (for e.g., for androgen deficiency, erectile dysfunction, benign prostatic hyperplasia etc.) (1) | <input type="radio"/> | <input type="radio"/>   | <input type="radio"/> |
| Sexual health care (for e.g., screening, prevention, and treatment of STIs) (2)                                           | <input type="radio"/> | <input type="radio"/>   | <input type="radio"/> |
| Accessing Assisted Reproductive Technology (3)                                                                            | <input type="radio"/> | <input type="radio"/>   | <input type="radio"/> |
| Partner of a woman trying to conceive (4)                                                                                 | <input type="radio"/> | <input type="radio"/>   | <input type="radio"/> |
| To improve fertility (for e.g., abnormal semen characteristics) (5)                                                       | <input type="radio"/> | <input type="radio"/>   | <input type="radio"/> |
| Assistance with another health condition (6)                                                                              | <input type="radio"/> | <input type="radio"/>   | <input type="radio"/> |

Display This Question:

If Which of the following populations does your health service provide for? (Select all that apply) = Adolescents

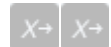

Q13 How frequently do adolescent men access your health service with the following reasons?

|                                                                                 | Rarely (1)            | About half the time (2) | Most of the time (3)  |
|---------------------------------------------------------------------------------|-----------------------|-------------------------|-----------------------|
| Sexual health care (for e.g., screening, prevention, and treatment of STIs) (1) | <input type="radio"/> | <input type="radio"/>   | <input type="radio"/> |
| Assistance with another health condition (2)                                    | <input type="radio"/> | <input type="radio"/>   | <input type="radio"/> |

End of Block: Populations

---

Start of Block: Preconception care

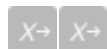

Q14 Which of the following preconception care areas are within your scope of practice? (*Select all that apply*)

Health behaviours (e.g., nutrition + physical activity + prenatal supplementation) (1)

Medical history: medical history and optimisation of pre-existing medical conditions + obstetric history + medications + genetic history (2)

Healthy weight (3)

Reproductive health: reproductive life planning + contraception (4)

Mental health: mental health + available support networks + isolation (5)

Substance use, smoking, alcohol (6)

History of trauma or family violence (7)

Environmental exposures (8)

Partner health (9)

Screening: sexually transmitted infection screening + cervical screening + genetic screening (10)

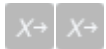

Q15 Which of the following health areas have you found most commonly need to be addressed amongst your patients?

|                                                                                                                                           | Rarely (1)            | About half the time (2) | Most of the time (3)  |
|-------------------------------------------------------------------------------------------------------------------------------------------|-----------------------|-------------------------|-----------------------|
| Nutrition (1)                                                                                                                             | <input type="radio"/> | <input type="radio"/>   | <input type="radio"/> |
| Physical activity (2)                                                                                                                     | <input type="radio"/> | <input type="radio"/>   | <input type="radio"/> |
| Prenatal supplementation (3)                                                                                                              | <input type="radio"/> | <input type="radio"/>   | <input type="radio"/> |
| Medical history: medical history and optimisation of pre-existing medical conditions, obstetric history, medications, genetic history (4) | <input type="radio"/> | <input type="radio"/>   | <input type="radio"/> |
| Weight (5)                                                                                                                                | <input type="radio"/> | <input type="radio"/>   | <input type="radio"/> |
| Reproductive health: reproductive life planning and contraception (6)                                                                     | <input type="radio"/> | <input type="radio"/>   | <input type="radio"/> |
| Mental health and available support networks (7)                                                                                          | <input type="radio"/> | <input type="radio"/>   | <input type="radio"/> |
| Substance use (8)                                                                                                                         | <input type="radio"/> | <input type="radio"/>   | <input type="radio"/> |
| Smoking (9)                                                                                                                               | <input type="radio"/> | <input type="radio"/>   | <input type="radio"/> |
| Alcohol (10)                                                                                                                              | <input type="radio"/> | <input type="radio"/>   | <input type="radio"/> |
| History of trauma or family violence (11)                                                                                                 | <input type="radio"/> | <input type="radio"/>   | <input type="radio"/> |
| Environmental exposures (12)                                                                                                              | <input type="radio"/> | <input type="radio"/>   | <input type="radio"/> |
| Partner health (13)                                                                                                                       | <input type="radio"/> | <input type="radio"/>   | <input type="radio"/> |

Screening: sexually transmitted infection screening, cervical screening (14)

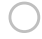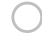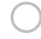

Genetic screening (15)

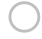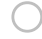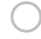

End of Block: Preconception care

---

Start of Block: Role/responsibility

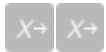

Q16 To your knowledge, which of the following health professions are providing preconception care in the community or sharing preconception health information? (*Select all that apply*)

- General practitioners (1)
- Obstetrician and gynaecologist (2)
- Specialist's physician (3)
- Specialist surgeon (4)
- Nurses (5)
- Midwives (6)
- Genetic counsellor (7)
- Social worker (8)
- Physiotherapist (9)
- Osteopath (10)
- Chiropractor (11)
- Dietician (12)
- Exercise physiologist (13)
- Chinese medicine practitioner (14)
- Acupuncturist (15)
- Nutritionist (16)

Naturopath (17)

Herbalist (18)

Massage therapist (19)

Other health professional not listed [Please describe] (20)

---

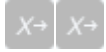

Q17 In your opinion, which health professions should ideally be involved in providing preconception health information and preconception care? (*Select all that apply*)

- General practitioners (1)
- Obstetrician and gynaecologist (2)
- Specialist's physician (3)
- Specialist surgeon (4)
- Nurses (5)
- Midwives (6)
- Genetic counsellor (7)
- Social worker (8)
- Physiotherapist (9)
- Osteopath (10)
- Chiropractor (11)
- Dietician (12)
- Exercise physiologist (13)
- Chinese medicine practitioner (14)
- Acupuncturist (15)
- Nutritionist (16)

Naturopath (17)

Herbalist (18)

Massage therapist (19)

Other health professional not listed [Please describe] (20)

---

-----

*Carry Forward Selected Choices from "In your opinion, which health professions should ideally be involved in providing preconception health information and preconception care? (Select all that apply) "*

Q18 In your opinion, currently how able are these health professionals to be providing preconception care ? (*Select the response*)

|                                     | Not all able<br>(1)   | Somewhat<br>unable (2) | Neither able<br>nor unable<br>(3) | Somewhat<br>able (4)  | Extremely<br>able (5) |
|-------------------------------------|-----------------------|------------------------|-----------------------------------|-----------------------|-----------------------|
| General practitioners (x1)          | <input type="radio"/> | <input type="radio"/>  | <input type="radio"/>             | <input type="radio"/> | <input type="radio"/> |
| Obstetrician and gynaecologist (x2) | <input type="radio"/> | <input type="radio"/>  | <input type="radio"/>             | <input type="radio"/> | <input type="radio"/> |
| Specialist's physician (x3)         | <input type="radio"/> | <input type="radio"/>  | <input type="radio"/>             | <input type="radio"/> | <input type="radio"/> |
| Specialist surgeon (x4)             | <input type="radio"/> | <input type="radio"/>  | <input type="radio"/>             | <input type="radio"/> | <input type="radio"/> |
| Nurses (x5)                         | <input type="radio"/> | <input type="radio"/>  | <input type="radio"/>             | <input type="radio"/> | <input type="radio"/> |
| Midwives (x6)                       | <input type="radio"/> | <input type="radio"/>  | <input type="radio"/>             | <input type="radio"/> | <input type="radio"/> |
| Genetic counsellor (x7)             | <input type="radio"/> | <input type="radio"/>  | <input type="radio"/>             | <input type="radio"/> | <input type="radio"/> |
| Social worker (x8)                  | <input type="radio"/> | <input type="radio"/>  | <input type="radio"/>             | <input type="radio"/> | <input type="radio"/> |
| Physiotherapist (x9)                | <input type="radio"/> | <input type="radio"/>  | <input type="radio"/>             | <input type="radio"/> | <input type="radio"/> |
| Osteopath (x10)                     | <input type="radio"/> | <input type="radio"/>  | <input type="radio"/>             | <input type="radio"/> | <input type="radio"/> |
| Chiropractor (x11)                  | <input type="radio"/> | <input type="radio"/>  | <input type="radio"/>             | <input type="radio"/> | <input type="radio"/> |
| Dietician (x12)                     | <input type="radio"/> | <input type="radio"/>  | <input type="radio"/>             | <input type="radio"/> | <input type="radio"/> |
| Exercise physiologist (x13)         | <input type="radio"/> | <input type="radio"/>  | <input type="radio"/>             | <input type="radio"/> | <input type="radio"/> |
| Chinese medicine practitioner (x14) | <input type="radio"/> | <input type="radio"/>  | <input type="radio"/>             | <input type="radio"/> | <input type="radio"/> |

|                                                              |                       |                       |                       |                       |                       |
|--------------------------------------------------------------|-----------------------|-----------------------|-----------------------|-----------------------|-----------------------|
| Acupuncturist (x15)                                          | <input type="radio"/> |
| Nutritionist (x16)                                           | <input type="radio"/> |
| Naturopath (x17)                                             | <input type="radio"/> |
| Herbalist (x18)                                              | <input type="radio"/> |
| Massage therapist (x19)                                      | <input type="radio"/> |
| Other health professional not listed [Please describe] (x20) | <input type="radio"/> |

End of Block: Role/responsibility

---

Start of Block: Timing or life stage

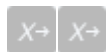

Q19 In your opinion, which of the following life course phases are relevant to preconception health information and/or preconception care? (*Select all that apply*)

- Children and adolescents (1)
  - Adults with no immediate intention to become pregnant (2)
  - Adults with intention to become pregnant (3)
  - Adults with intention to become pregnant again (4)
  - Other [Please describe] (5)
-

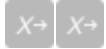

Q20 Which life course phases are you able to provide preconception health information and/or preconception care? *(Select all that apply)*

- Children and adolescents (1)
  - Adults with no immediate intention to become pregnant (2)
  - Adults with intention to become pregnant (3)
  - Adults with intention to become pregnant again (4)
  - Other [Please describe] (5)
- 

End of Block: Timing or life stage

---

Start of Block: Practice behaviours

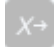

Q21 In your clinical experience, how frequently do the following apply to preconception care?

|                                                                                                                                           | Never (1)             | Sometimes (2)         | About half the time (3) | Most of the time (4)  | Always (5)            |
|-------------------------------------------------------------------------------------------------------------------------------------------|-----------------------|-----------------------|-------------------------|-----------------------|-----------------------|
| Involves the female reproductive partner. (1)                                                                                             | <input type="radio"/> | <input type="radio"/> | <input type="radio"/>   | <input type="radio"/> | <input type="radio"/> |
| Only involves the female reproductive partner if infertility is a factor for the couple (2)                                               | <input type="radio"/> | <input type="radio"/> | <input type="radio"/>   | <input type="radio"/> | <input type="radio"/> |
| The female reproductive partner appears to underestimate the role of their own health before pregnancy on their future child's health (3) | <input type="radio"/> | <input type="radio"/> | <input type="radio"/>   | <input type="radio"/> | <input type="radio"/> |
| The female reproductive partner is used to provide preconception health information to the male reproductive partner (4)                  | <input type="radio"/> | <input type="radio"/> | <input type="radio"/>   | <input type="radio"/> | <input type="radio"/> |

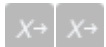

Q22 In your clinical experience, how frequently do the following apply to preconception care?

|                                                                                                                                         | Never (1)             | Sometimes (2)         | About half the time (3) | Most of the time (4)  | Always (5)            |
|-----------------------------------------------------------------------------------------------------------------------------------------|-----------------------|-----------------------|-------------------------|-----------------------|-----------------------|
| Involves the male reproductive partner (1)                                                                                              | <input type="radio"/> | <input type="radio"/> | <input type="radio"/>   | <input type="radio"/> | <input type="radio"/> |
| Only involves the male reproductive partner if infertility is a factor for the couple (2)                                               | <input type="radio"/> | <input type="radio"/> | <input type="radio"/>   | <input type="radio"/> | <input type="radio"/> |
| The male reproductive partner appears to underestimate the role of their own health before pregnancy on their future child's health (3) | <input type="radio"/> | <input type="radio"/> | <input type="radio"/>   | <input type="radio"/> | <input type="radio"/> |
| The male reproductive partner is used to provide preconception health information to the female reproductive partner (4)                | <input type="radio"/> | <input type="radio"/> | <input type="radio"/>   | <input type="radio"/> | <input type="radio"/> |



Q23 How willing do you think women are to engage in health behaviour change in preconception care?

- Not at all willing (1)
  - Somewhat willing (2)
  - Mostly willing (3)
  - Very willing (4)
- 

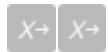

Q24 How willing do you think men are to engage in health behaviour change in preconception care?

- Not at all willing (1)
- Somewhat willing (2)
- Mostly willing (3)
- Very willing (4)

End of Block: Practice behaviours

---

Start of Block: Information-seeking behaviour

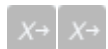

Q25 Which of the following sources do you use to inform the preconception care you provide to your patients? (*Select all that apply*)

- Scientific journals by researchers (1)
  - Professional journals for clinicians (2)
  - Clinical textbooks (3)
  - Product companies (4)
  - Conferences or other professional events (5)
  - Clinical guidelines (6)
  - Laboratory tests, pathology, or radiology tests (7)
  - The patient (8)
  - Other (please describe) (9)
- 

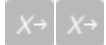

Q26 Which of the following types of knowledge do you use to inform the preconception care you provide to your patients? (*Select all that apply*)

- Your initial clinical training (1)
  - Continuing professional education delivered by an expert clinician (2)
  - Continuing professional education delivered by a researcher (3)
  - Discussions with professional peers (4)
  - Discussions with a mentor or expert (5)
  - Your clinical experience (6)
  - Your personal lived experience (7)
  - The patient's unique needs and preferences (8)
  - The patient's experience of their body and their health (9)
  - Other (please describe) (10)
- 

End of Block: Information-seeking behaviour

---

Start of Block: Barriers and enablers to preconception care

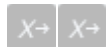

Q27 In your experience, which of the following are barriers to delivering preconception care?  
(Select all that apply)

- Clinical time constraints (1)
  - Lack of an established preconception care program (2)
  - Lack of incentivisation for preconception care consultations (3)
  - Lack of patient preconception health awareness (4)
  - Lack of overall recognition of the importance of preconception health in the community (5)
  - Lack of clinical preconception care resources (6)
  - Lack of clinician preconception health knowledge (7)
  - Poor coordination, preconception care amongst health professionals (8)
  - Conflicting views of health professionals regarding preconception care priorities (9)
  - Not enough positive public health messages about preconception health (10)
  - Not enough public health messages about preconception health that include the male partner (11)
  - A lack of preconception health education in schools (12)
  - No access to a medicare item for providing preconception care consultations in general practice settings (13)
  - Other (please describe) (14)
-

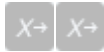

Q28 In your experience, which of the following are enablers to delivering preconception care?  
(Select all that apply)

- Preconception care clinician checklists (1)
  - Preconception care patient brochures and handouts (2)
  - Preconception care clinician waiting room posters (3)
  - Clinician asking about patient pregnancy intention (4)
  - Other (please describe) (5)
- 

End of Block: Barriers and enablers to preconception care

---

Start of Block: Survey completion encouragement message

Q29 Thank you for completing the first part of our survey about your perspectives and experiences as a health professional providing preconception care.

The second part of our survey investigates participants' knowledge about preconception risk factors and outcomes. We acknowledge that this area of practice may be quite new. The results from our survey will help us to identify gaps and opportunities regarding health professionals' knowledge to help identify training needs assessments.

Please take the time to complete this second part of the survey.

End of Block: Survey completion encouragement message

---

Start of Block: Knowledge of likelihood: Maternal health status and health behaviours

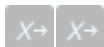

Q30 What is the likelihood that the following will lead to poor **maternal health** and **pregnancy outcomes**?

|  | What is the likelihood?   |                            |                          |                        |                       |                         | Or, are you unsure? |
|--|---------------------------|----------------------------|--------------------------|------------------------|-----------------------|-------------------------|---------------------|
|  | Extremely unlikely<br>(1) | Moderately unlikely<br>(2) | Slightly unlikely<br>(3) | Slightly likely<br>(4) | Moderately likely (5) | Extremely likely<br>(6) | Yes (7)             |

|                                                       |                       |                       |                       |                       |                       |                       |                       |
|-------------------------------------------------------|-----------------------|-----------------------|-----------------------|-----------------------|-----------------------|-----------------------|-----------------------|
| Maternal pre-pregnancy underweight (1)                | <input type="radio"/> |
| Maternal pre-pregnancy overweight (2)                 | <input type="radio"/> |
| Maternal pre-pregnancy obesity (3)                    | <input type="radio"/> |
| Short inter-pregnancy interval (4)                    | <input type="radio"/> |
| Maternal multivitamin supplements intake (5)          | <input type="radio"/> |
| Maternal folic acid supplement intake (6)             | <input type="radio"/> |
| Maternal smoking (7)                                  | <input type="radio"/> |
| Maternal alcohol consumption (8)                      | <input type="radio"/> |
| Maternal consumption of higher levels of caffeine (9) | <input type="radio"/> |
| Poor maternal diet (10)                               | <input type="radio"/> |
| Maternal lack of physical activity (11)               | <input type="radio"/> |

Maternal exposure to ambient air pollution (12)

○ ○ ○ ○ ○ ○ ○

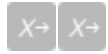

Q31 What is the likelihood that the following will lead to poor **offspring (fetal, infant, child) health outcomes?**

|  | What is the likelihood? |                         |                       |                     |                       |                      | Or, are you unsure? |
|--|-------------------------|-------------------------|-----------------------|---------------------|-----------------------|----------------------|---------------------|
|  | Extremely unlikely (1)  | Moderately unlikely (2) | Slightly unlikely (3) | Slightly likely (4) | Moderately likely (5) | Extremely likely (6) | Yes (7)             |

|                                                       |                       |                       |                       |                       |                       |                       |                       |
|-------------------------------------------------------|-----------------------|-----------------------|-----------------------|-----------------------|-----------------------|-----------------------|-----------------------|
| Maternal pre-pregnancy underweight (1)                | <input type="radio"/> |
| Maternal pre-pregnancy overweight (2)                 | <input type="radio"/> |
| Maternal pre-pregnancy obesity (3)                    | <input type="radio"/> |
| Short inter-pregnancy interval (4)                    | <input type="radio"/> |
| Maternal multivitamin supplements intake (5)          | <input type="radio"/> |
| Maternal folic acid supplement intake (6)             | <input type="radio"/> |
| Maternal smoking (7)                                  | <input type="radio"/> |
| Maternal alcohol consumption (8)                      | <input type="radio"/> |
| Maternal consumption of higher levels of caffeine (9) | <input type="radio"/> |
| Poor maternal diet (10)                               | <input type="radio"/> |
| Maternal lack of physical activity (11)               | <input type="radio"/> |
| Maternal exposure to ambient air pollution (12)       | <input type="radio"/> |

Paternal BMI during the preconception period (13)

Paternal preconception exposure to radiation (14)

Paternal preconception exposure to chemicals (15)

Paternal illicit drug use during the preconception period (16)

End of Block: Knowledge of likelihood: Maternal health status and health behaviours

Start of Block: Knowledge of maternal preconception risk or health behaviours outcomes



Q32 What is the likelihood that **maternal preconception risk or health behaviours** influence the following outcomes?

|  | What is the likelihood? |                         |                       |                     |                       |                      | Or, are you unsure? |
|--|-------------------------|-------------------------|-----------------------|---------------------|-----------------------|----------------------|---------------------|
|  | Extremely unlikely (1)  | Moderately unlikely (2) | Slightly unlikely (3) | Slightly likely (4) | Moderately likely (5) | Extremely likely (6) | Yes (7)             |

|                                                                |                       |                       |                       |                       |                       |                       |                       |
|----------------------------------------------------------------|-----------------------|-----------------------|-----------------------|-----------------------|-----------------------|-----------------------|-----------------------|
| Maternal antenatal depression (1)                              | <input type="radio"/> |
| Maternal postnatal depression (2)                              | <input type="radio"/> |
| Gestational diabetes mellitus (3)                              | <input type="radio"/> |
| Maternal obesity (4)                                           | <input type="radio"/> |
| Preeclampsia (5)                                               | <input type="radio"/> |
| Placental abruption (6)                                        | <input type="radio"/> |
| Uterine rupture (attempting vaginal birth after caesarean) (7) | <input type="radio"/> |
| Miscarriage (8)                                                | <input type="radio"/> |
| Pregnancy induced hypertension (9)                             | <input type="radio"/> |
| Reduced embryonic development (10)                             | <input type="radio"/> |

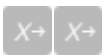

Q33 What is the likelihood that **maternal preconception risk or health behaviours** influence the following outcomes?

| How do you rate the likelihood? |                         |                       |                     |                       |                      | Or, are you unsure? |
|---------------------------------|-------------------------|-----------------------|---------------------|-----------------------|----------------------|---------------------|
| Extremely unlikely (1)          | Moderately unlikely (2) | Slightly unlikely (3) | Slightly likely (4) | Moderately likely (5) | Extremely likely (6) | Yes (7)             |

|                               |                       |                       |                       |                       |                       |                       |                       |
|-------------------------------|-----------------------|-----------------------|-----------------------|-----------------------|-----------------------|-----------------------|-----------------------|
| Low birthweight (1)           | <input type="radio"/> |
| Small for gestational age (2) | <input type="radio"/> |
| Preterm birth (3)             | <input type="radio"/> |
| Neural tube defects (4)       | <input type="radio"/> |
| Congenital heart defects (5)  | <input type="radio"/> |
| Congenital abnormalities (6)  | <input type="radio"/> |
| Large for gestational age (7) | <input type="radio"/> |
| Macrosomia (8)                | <input type="radio"/> |
| Neonatal admission to ICU (9) | <input type="radio"/> |
| Stillbirth (10)               | <input type="radio"/> |
| Cryptorchidism (11)           | <input type="radio"/> |
| Shoulder dystocia (12)        | <input type="radio"/> |
| Labour dystocia (13)          | <input type="radio"/> |
| Precipitous labour (14)       | <input type="radio"/> |
| Medically induced labour (15) | <input type="radio"/> |

Caesarean delivery (16)

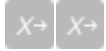

Q34 What is the likelihood that **maternal preconception risks or health behaviours** influence the following outcomes?

|  | How do you rate the likelihood? |                         |                       |                     |                       |                      | Or, are you unsure? |
|--|---------------------------------|-------------------------|-----------------------|---------------------|-----------------------|----------------------|---------------------|
|  | Extremely unlikely (1)          | Moderately unlikely (2) | Slightly unlikely (3) | Slightly likely (4) | Moderately likely (5) | Extremely likely (6) | Yes (7)             |

|                                              |                       |                       |                       |                       |                       |                       |                       |
|----------------------------------------------|-----------------------|-----------------------|-----------------------|-----------------------|-----------------------|-----------------------|-----------------------|
| Neurocognitive development (1)               | <input type="radio"/> |
| Gross motor function (2)                     | <input type="radio"/> |
| Overweight (3)                               | <input type="radio"/> |
| Cerebral palsy (4)                           | <input type="radio"/> |
| Attention deficit hyperactivity disorder (5) | <input type="radio"/> |
| Autism spectrum disorder (6)                 | <input type="radio"/> |
| Developmental delay (7)                      | <input type="radio"/> |
| Emotional/behavioral problems (8)            | <input type="radio"/> |
| Leukaemia (9)                                | <input type="radio"/> |
| Asthma (10)                                  | <input type="radio"/> |

End of Block: Knowledge of maternal preconception risk or health behaviours outcomes

Start of Block: Knowledge of paternal preconception risks or health behaviour outcomes

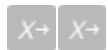

Q35 What is the likelihood that **paternal preconception risks or health behaviours** influence the following outcomes?

|  | How do you rate the likelihood? |                         |                       |                     |                       |                      | Or, are you unsure |
|--|---------------------------------|-------------------------|-----------------------|---------------------|-----------------------|----------------------|--------------------|
|  | Extremely unlikely (1)          | Moderately unlikely (2) | Slightly unlikely (3) | Slightly likely (4) | Moderately likely (5) | Extremely likely (6) | Yes (7)            |
|  |                                 |                         |                       |                     |                       |                      |                    |

|                                                                  |                       |                       |                       |                       |                       |                       |                       |
|------------------------------------------------------------------|-----------------------|-----------------------|-----------------------|-----------------------|-----------------------|-----------------------|-----------------------|
| Low birthweight (1)                                              | <input type="radio"/> |
| Reduced intrauterine growth (2)                                  | <input type="radio"/> |
| Neural tube defects (3)                                          | <input type="radio"/> |
| Congenital heart defects (4)                                     | <input type="radio"/> |
| Childhood overweight (5)                                         | <input type="radio"/> |
| Childhood cancers (Leukaemia, acute lymphoblastic leukaemia) (6) | <input type="radio"/> |

End of Block: Knowledge of paternal preconception risks or health behaviour outcomes

---
