# Supplementary material
Source: Research Square preprint supplement (doi:10.21203/rs.3.rs-10032196/v1)
Supplement: Supplementary file 2 [file cdfb0a168b68e58448a489c4.docx]

**Table 1. Participant Characteristics**

| **Participant Characteristics** | **All**  **(n=373)** | **GP**  **(n=124)** | **Midwives**  **(n=101)** | **Naturopaths (n=153)** | ***p*** |
| --- | --- | --- | --- | --- | --- |
| ***n (%)*** | ***n (%)*** | ***n (%)*** | ***n (%)*** |
| **Clinical Practice Experience (n-373)** |  |  |  |  |  |
| Less than 5 years | 132(35.4) | 31(25.6) | 42(42.0) | 59(38.8) | **<0.001** |
| 5 to 10 years | 141(37.8) | 62(51.2) | 42(42.0) | 37(24.3) |
| 11 to 15 years | 51(13.7) | 16(13.2) | 10(10.0) | 25(16.4) |
| More than 16 years | 49 (13.1) | 12 (9.9) | 6 (6.0) | 31 (20.4) |
| **Clinical practice setting (n=373)** |  |  |  |  |  |
| Clinical practice by myself | 110(29.5) | 16(9.1) | 21(21.0) | 73(48.0) | **<0.001** |
| Clinical practice with other HPs | 203(54.4) | 71(58.7) | 58(58.0) | 74(48.7) | 0.181 |
| Hospital setting | 136(36.5) | 58(48.0) | 52(52.0) | 26(17.1) | **<0.001** |
| Other | 2(0.5) | 1(0.8) | 0(0.0) | 1(0.6) | 0.680 |
| **Gender(n=372)** |  |  |  |  |  |
| Woman | 229(61.6) | 54(44.6) | 59(59.0) | 116(76.3) | **<0.001** |
| Man | 135(36.3) | 65(53.7) | 36(36.0) | 34(22.5) |
| Non-binary, gender diverse, or not disclosed | 8(2.1) | 2(1.7) | 5 (5.0) | 1(0.7) |
| **Age(n=373)** |  |  |  |  |  |
| 29 years or younger | 137 (36.7) | 48(39.7) | 53 (53.0) | 36 (23.7) | **<0.001** |
| 30 to 39 years | 139(37.0) | 52(43.0) | 39 (39.0) | 47 (30.9) |
| 40 to 49 years | 61(16.3) | 16(13.2) | 4 (4.0) | 41 (27.0) |
| 50 years or older | 37 (9.9) | 5 (4.1) | 4 (4.0) | 28 (18.4) |
| **Patient populations supported (n=373)*** |  |  |  |  |  |
| adult women | 297(79.6) | 95(78.5) | 69(69.0) | 133(87.5) | **0.002** |
| adult men | 212(56.8) | 78(64.5) | 38(38.0) | 96(63.1) | **<0.001** |
| infants | 145(38.9) | 42(35.0) | 38(38.0) | 65(42.8) | 0.390 |
| children | 140(37.5) | 41(33.9) | 20(20.0) | 79(52.0) | **<0.001** |
| adolescents | 148(39.7) | 41(33.9) | 26(26.0) | 81(53.3) | **<0.001** |
| elderly | 90(24.1) | 24(19.8) | 13(13.0) | 53(35.0) | **<0.001** |
| marginalised populations | 53(14.2) | 16(13.2) | 8(8.0) | 29(19.1) | **0.045** |
| indigenous peoples | 62(16.6) | 17(14.0) | 13(13.0) | 32(21.0) | 0.159 |
| culturally- and linguistically-diverse (CALD) communities | 34(9.1) | 9(7.4) | 7(7.0) | 18(11.8) | 0.314 |
| other populations not listed | 8(2.1) | 2(1.6) | 1(1.0) | 5(3.3) | 0.425 |

*participants could select more than one population group

**Table 2. Reasons for accessing care by population (adolescent/adult women and men)**

| **Reason for accessing care** | **All** | **GP** | **Midwife** | **Naturopath** | ***p*** |
| --- | --- | --- | --- | --- | --- |
| **Adult women** | Mean (SD)* | Mean (SD)* | Mean (SD)* | Mean (SD)* |
| *Reproductive health care (n=288)* | 2.1 (0.7) | 2.0(0.5) | 1.8(0.7) | 2.3(0.7) | **<0.001** |
| *Planning to conceive next 3 months to 2 years (n=285)* | 2.1 (0.7) | 2.1(0.6) | 2.0(0.7) | 2.0(0.7) | 0.242 |
| *Pregnancy support (n=285)* | 2.1 (0.7) | 2.1(0.6) | 2.4(0.6) | 2.0(0.7) | **0.047** |
| *Postnatal support (n=288)* | 2.1 (0.7) | 2.1(0.6) | 2.3(0.6) | 2.0(0.7) | **0.005** |
| *Planning to conceive next 3 months (n=283)* | 2.0 (0.7) | 2.0(0.6) | 1.9(0.7) | 2.0(0.7) | 0.095 |
| *Wanting to improve fertility (n=284)* | 2.0 (0.7) | 2.0(0.5) | 1.9(0.7) | 2.0(0.7) | 0.172 |
| *Contraceptive advice and/or prescription (n=285)* | 1.9 (0.7) | 2.0(0.6) | 2.0(0.6) | 1.7(0.8) | **<0.001** |
| *Sexual health care (n=286)* | 1.8 (0.7) | 2.0(0.6) | 2.0(0.7) | 1.5(0.7) | **<0.001** |
| *Accessing Assisted Reproductive Technology (n=285)* | 1.8 (0.7) | 1.9(0.6) | 2.1(0.7) | 1.7(0.7) | **<0.001** |
| *Other condition (n=286)* | 2.2 (0.7) | 2.1(0.6) | 2.0(0.7) | 2.2(0.7) | 0.192 |
| **Adult men** |  |  |  |  |  |
| *To improve fertility (n=203)* | 1.9 (0.7) | 2.0(0.6) | 2.1(0.6) | 1.6(0.7) | **<0.001** |
| *Accessing assisted reproductive technology (n=201)* | 1.8 (0.7) | 2.1(0.7) | 2.1(0.6) | 1.4(0.7) | **<0.001** |
| *Partner of woman attempting to conceive (n=204)* | 1.8 (0.7) | 2.0(0.6) | 2.2(0.7) | 1.7(0.7) | **<0.001** |
| *Sexual health care (n=203)* | 1.7 (0.7) | 2.0(0.7) | 2.1(0.5) | 1.3(0.6) | **<0.001** |
| *Reproductive health care (n=203)* | 1.7 (0.6) | 1.9(0.5) | 1.9(0.7) | 1.5(0.6) | **<0.001** |
| *Other health condition (n=203)* | 2.1 (0.7) | 2.1(0.6) | 2.1(0.6) | 2.1(0.8) | **0.005** |
| **Adolescent women** |  |  |  |  |  |
| *Reproductive health care (n=138)* | 1.9 (0.6) | 1.9(0.5) | 1.75(0.7) | 1.8(0.6) | 0.541 |
| *Pregnancy support (n=136)* | 1.8 (0.7) | 2.0(0.6) | 2.4(0.6) | 1.3(0.5) | **<0.001** |
| *Contraceptive advice and/or prescription (n=138)* | 1.8 (0.8) | 2.2(0.5) | 2.4(0.6) | 1.5(0.7) | **<0.001** |
| *Antenatal and postpartum (n=136)* | 1.7 (0.8) | 1.9(0.7) | 2.5(0.6) | 1.4(0.7) | **<0.001** |
| *Planning to conceive next 3 months (n=137)* | 1.6 (0.7) | 2.0(0.8) | 2.0(0.8) | 1.3(0.6) | **<0.001** |
| *Sexual health care (n=137)* | 1.6 (0.7) | 2.0 (0.7) | 2.1 (0.6) | 1.3(0.6) | **<0.001** |
| *Planning to conceive next 3 months to 2 years (n=146)* | 1.6 (0.7) | 1.7(0.6) | 2.0(0.8) | 1.4(0.7) | **0.001** |
| *Other health condition (n=137)* | 2.2 (0.7) | 2.2(0.6) | 2.0(0.6) | 2.3(0.7) | 0.458 |
| **Adolescent men** |  |  |  |  |  |
| *Sexual health care (n=138)* | 1.6(0.6) | 2.0(0.5) | 1.8(0.7) | 1.3(0.5) | **<0.001** |
| *Other health condition (n=138)* | 1.9(0.8) | 2.2(0.8) | 1.8(0.7) | 1.8(0.8) | **0.019** |

***** *Responses included Rarely (1), About half the time (2), Most the time (3)*

**Table 3. Timing or life stage and willingness**

|  | **All** | **GPs** | **Midwives** | **Naturopaths** | ***p*** |
| --- | --- | --- | --- | --- | --- |
|  | ***n (%)*** | ***n (%)*** | ***n (%)*** | ***n (%)*** |
| **Life course phases relevant to preconception health and preconception care (n=373)** |  |  |  |  |  |
|  |  | *n=121* | *n=100* | *n=152* |  |
| *Children and adolescents* | 74(19.8) | 18(14.9) | 18(18.0) | 38(25.0) | 0.099 |
| *Adults no immediate pregnancy intention* | 193(52.0) | 60(19.6) | 46(46.0) | 87(57.2) | 0.184 |
| *Adults intending pregnancy* | 287(77.0) | 91(75.2) | 75(75.0) | 121(79.6) | 0.599 |
| *Adults intending pregnancy again* | 234(62.7) | 81(66.9) | 49(49.0) | 104(68.4) | **0.004** |
| *Other* | 7(1.9) | 2(1.6) | 1(1.0) | 4(2.6) | 0.631 |
| **Life course phases relevant to health professional (n=373)** |  |  |  |  |  |
|  |  | *n=121* | *n=100* | *n=152* |  |
| *Children and adolescents* | 60(16.0) | 22(18.2) | 11(11.0) | 27(17.8) | 0.269 |
| *Adults no immediate pregnancy intention* | 184(49.3) | 53(43.8) | 39(39.0) | 92(60.5) | **0.001** |
| *Adults intending pregnancy* | 272(73.0) | 92(75.4) | 60(60.0) | 120(78.9) | **0.003** |
| *Adults intending pregnancy again* | 238(63.8) | 77(63.6) | 57(57.0) | 104(68.4) | 0.182 |
| *Other* | 3(0.8) | 1(0.8) | 1(1.0) | 1(0.6) | 0.956 |
|  | ***Mean (SD)**** | ***Mean (SD)**** | ***Mean (SD)**** | ***Mean (SD)**** | ***p*** |
| **Women's willingness for preconception care (n=348)** | 2.8(0.9) | 2.8(0.7) | 2.5(0.8) | 3.0(0.9) | **0.011** |
| **Men's willingness for preconception care (n=348)** | 2.4(0.7) | 1.6(0.7) | 2.3(0.6) | 2.3(0.8) | **0.0002** |

* *Responses included: Not willing at all (1), Somewhat willing (2), Mostly willing (3), Very willing (4)*

**Table 4. Preconception care practice behaviours**

| **Preconception practice behaviours** | **All** | **GP**  *(n=121)* | **Midwife**  *(n=100)* | **Naturopath**  *(n=152)* | ***p* value** |
| --- | --- | --- | --- | --- | --- |
| **Preconception scope of practice (n=373)** | *n (%)* | *n (%)* | *n (%)* | *n (%)* |
| *Health behaviours (n=358)* | 252 (70.4) | 84 (70.6) | 50 (52.1) | 118 (82.5) | **<0.001** |
| *Medical historyǂ (n=357)* | 231 (64.7) | 83 (69.8) | 58 (61.1) | 90 (62.9) | 0.354 |
| *Reproductive life planning and contraception (n=356)* | 203 (57.0) | 64 (54.2) | 47 (49.5) | 92 (64.3) | 0.058 |
| *Healthy weight (n=356)* | 174 (48.9) | 36 (30.5) | 29 (30.5) | 109 (76.2) | **<0.001** |
| *Mental health (n=355)* | 145 (40.9) | 46 (39.3) | 29 (30.5) | 70 (49.0) | **0.017** |
| *Substance use (n=355)* | 101 (28.5) | 28 (23.9) | 17 (17.9) | 56 (39.2) | **0.001** |
| *Environmental exposures (n=355)* | 98 (27.6) | 18 (15.4) | 10 (10.5) | 70 (49.0) | **<0.001** |
| *Partner health (n=355)* | 95 (26.8) | 16 (13.7) | 10 (10.5) | 69 (48.3) | **<0.001** |
| *Screening (Sexually transmitted infections, cervical, genetic) (n=355)* | 68 (19.2) | 27 (23.1) | 17 (17.9) | 24 (16.8) | 0.411 |
| *History trauma/family violence (n=356)* | 61 (17.1) | 19 (16.1) | 9.0 (9.5) | 33 (23.1) | **0.023** |
| **Health areas requiring attention in preconception care patients** | *Mean (SD)** | *Mean (SD)** | *Mean (SD)** | *Mean (SD)** |  |
| *Medical Historyǂ (n=358)* | 2.2 (0.6) | 2.1 (0.6) | 2.2 (0.6) | 2.2 (0.7) | **0.008** |
| *Nutrition (n=355)* | 2.2 (0.7) | 2.0 (0.5) | 1.9 (0.7) | 2.5 (0.7) | **<0.001** |
| *Prenatal supplementation (n=354)* | 2.2 (0.7) | 2.1 (0.6) | 2.0 (1.0) | 2.3 (0.8) | **0.001** |
| *Physical activity (n=357)* | 2.1 (0.7) | 2.1 (0.7) | 2.0 (0.6) | 2.2 (0.7) | 0.108 |
| *Reproductive life planning and contraception (n=356)* | 2.1 (0.7) | 2.2 (0.7) | 2.2 (0.6) | 2.0 (0.7) | 0.096 |
| *Partner health (n=351)* | 2.1 (0.7) | 2.1 (0.6) | 2.1 (0.7) | 2.0 (0.8) | **0.031** |
| *Mental health (n=355)* | 2.0 (0.7) | 2.0 (0.6) | 2.1 (0.6) | 2.0 (0.7) | 0.301 |
| *Weight (n=354)* | 2.0 (0.6) | 2.1 (0.6) | 2.1 (0.6) | 2.0 (0.6) | 0.612 |
| *Environmental exposures (n=352)* | 2.0 (0.7) | 1.9 (0.7) | 2.0 (0.7) | 1.9 (0.7) | 0.094 |
| *Alcohol (n=352)* | 1.9 (0.7) | 1.9 (0.7) | 1.9 (0.7) | 1.8 (0.7) | **0.028** |
| *History trauma/family violence (n=351)* | 1.9 (0.7) | 2.1 (0.7) | 2.0 (0.6) | 1.7 (0.7) | **<0.001** |
| *Screening (Sexually transmitted infections, cervical) (n=353)* | 1.9 (0.7) | 2.1 (0.6) | 2.1 (0.6) | 1.7 (0.8) | **<0.001** |
| *Genetic screening (n=352)* | 1.9 (0.7) | 2.1 (0.5) | 2.0 (0.7) | 1.7 (0.8) | **<0.001** |
| *Substance use (n=353)* | 1.8 (0.7) | 2.0 (0.6) | 2.0 (0.6) | 1.5 (0.7) | **<0.001** |
| *Smoking (n=353)* | 1.8 (0.7) | 2.0 (0.7) | 2.0 (0.7) | 1.6 (0.8) | **<0.001** |
| **Occurrence of gender balance in preconception care** | *Mean (SD)*** | *Mean (SD)*** | *Mean (SD)*** | *Mean (SD)*** |  |
| *Preconception care involves female reproductive partner (n=343)* | 3.4 (1.1) | 3.2 (0.9) | 3.1 (0.9) | 3.6 (1.3) | **<0.001** |
| *Male reproductive partner underestimates their role in preconception care (n=344)* | 3.4 (1.1) | 3.2 (0.9) | 3.4 (1.1) | 3.6 (1.2) | **<0.001** |
| *Female reproductive partner underestimates their role in preconception care (n=345)* | 3.2 (1.0) | 3.2 (1.0) | 3.1 (1.0) | 3.3 (1.1) | 0.255 |
| *Female partner provides preconception care information to male reproductive partner (n=342)* | 3.2 (1.0) | 3.3 (0.9) | 3.2 (1.0) | 3.3 (1.1) | **0.001** |
| *Preconception care involves male reproductive partner (n=346)* | 3.0 (1.0) | 3.2 (0.9) | 3.0 (1.0) | 2.9 (1.1) | **0.002** |
| *Only involves female reproductive partner if treating infertility (n=345)* | 2.9 (1.1) | 3.1 (1.0) | 2.9 (1.1) | 2.8 (1.2) | **0.001** |
| *Only involves male reproductive partner if treating infertility (n=344)* | 2.8 (1.1) | 3.0 (1.0) | 2.9 (1.0) | 2.6 (1.2) | **<0.001** |
| *Male reproductive partner provides preconception health information to female partner (n=344)* | 2.7 (1.2) | 3.1 (1.0) | 3.0 (1.1) | 2.3 (1.4) | **<0.001** |

*ǂ Medical history: optimisation of pre-existing medical conditions, obstetric history, medications and genetic history*

** Responses included Rarely (1), About half the time (2), Most the time (3)*

*** Responses included Never (1), Sometimes (2), About half the time (3), Most the time (4), Always (5)*

**Table 5. Perceptions of health professionals’ current and potential role in preconception care**

| **Profession** | **Currently delivering preconception care** | | | | | **Should be delivering preconception care** | | | | | **Capability or capacity to deliver preconception care** | | | | |
| --- | --- | --- | --- | --- | --- | --- | --- | --- | --- | --- | --- | --- | --- | --- | --- |
|  | **All**  **(n=373)** | **GP**  **(n=121)** | **Midwife**  **(n=100)** | **Naturopath**  **(n=152)** | ***p*** | **All**  **(n=373)** | **GP**  **(n=121)** | **Midwife**  **(n=100)** | **Naturopath**  **(n=152)** | ***p*** | **All** | **GP** | **Midwife** | **Naturopath** | ***p*** |
|  | ***n (%)*** | ***n (%)*** | ***n (%)*** | ***n (%)*** | ***n (%)*** | ***n (%)*** | ***n (%)*** | ***n (%)*** | ***Mean (SD)**** | ***Mean (SD)**** | ***Mean (SD)**** | ***Mean (SD)**** |
| *Obstetrician & Gynaecolocgist* | 245 (65.7) | 95 (78.5) | 66 (66.0) | 84  (55.3) | **<0.001** | 242 (64.8) | 82 (67.8) | 66 (66.0) | 94  (61.8) | 0.573 | 3.9  (1.2) | 4.2  (0.9) | 3.8  (1.2) | 3.6  (1.3) | **0.001** |
| *General Practitioners* | 197 (52.8) | 87 (71.9) | 51 (51.0) | 59  (38.8) | **<0.001** | 210 (56.3) | 83 (68.5) | 37 (37.0) | 90  (59.2) | <**0.001** | 3.6  (1.2) | 4.0  (1.1) | 3.9  (1.1) | 3.3  (1.2) | **0.002** |
| *Midwives* | 157 (42.1) | 37 (30.6) | 40 (40.0) | 80  (52.6) | **0.001** | 163 (43.7) | 36 (29.7) | 46 (46.0) | 81  (53.3) | **<0.001** | 3.8  (1.2) | 3.8  (1.1) | 3.7  (1.2) | 3.9  (1.2) | 0.314 |
| *Naturopath* | 116 (31.1) | 8  (6.6) | 11 (11.0) | 97  (63.8) | **<0.001** | 98 (26.3) | 7  (5.7) | 7  (7.0) | 84  (55.2) | **<0.001** | 4.4  (0.9) | 3.7  (0.5) | 3.6  (1.2) | 4.6  (0.8) | **0.001** |
| *Specialist physician* | 110 (29.5) | 55 (45.5) | 23 (23.0) | 32  (21.0) | **<0.001** | 134 (35.9) | 46 (38.0) | 36 (36.0) | 52  (34.2) | 0.809 | 3.6  (1.2) | 3.8  (1.0) | 3.7  (1.0) | 3.5  (1.3) | **0.050** |
| *Nurses* | 102 (27.4) | 31 (25.6) | 36 (36.0) | 35  (23.0) | 0.068 | 128 (34.3) | 37 (30.5) | 33 (33.0) | 58  (38.1) | 0.402 | 3.6  (1.2) | 3.6  (1.0) | 3.5  (1.1) | 3.5  (1.1) | 0.446 |
| *Nutritionist* | 96 (25.7) | 10  (8.3) | 12 (12.0) | 74  (48.7) | **<0.001** | 111 (29.8) | 14 (11.5) | 18 (18.0) | 79  (51.9) | **<0.001** | 4.1  (1.0) | 3.6  (1.2) | 3.8  (1.2) | 4.3  (0.9) | **0.019** |
| *Dietician* | 74 (19.8) | 10  (8.3) | 18 (18.0) | 46  (30.3) | **<0.001** | 103 (27.6) | 20 (16.5) | 18 (18.0) | 65  (42.7) | **<0.001** | 3.8  (1.1) | 3.5  (1.2) | 3.9  (1.0) | 3.8  (1.0) | 0.557 |
| *Chinese medicine practitioner* | 70 (18.8) | 9  (7.5) | 7  (7.0) | 54  (35.5) | **<0.001** | 86 (23.1) | 10  (8.3) | 9  (9.0) | 67  (44.0) | **<0.001** | 4.0  (0.8) | 3.8  (1.1) | 3.9  (0.9) | 4.0  (0.8) | 0.744 |
| *Herbalist* | 68 (18.2) | 6  (5.0) | 5  (5.0) | 57  (37.5) | **<0.001** | 69 (18.5) | 6  (5.0) | 4  (4.0) | 59  (38.8) | **<0.001** | 4.1  (0.8) | 3.7  (0.5) | 4.2  (0.5) | 4.1  (0.8) | 0.436 |
| *Acupuncturist* | 60 (16.1) | 5  (4.1) | 5  (5.0) | 50  (33.0) | **<0.001** | 71 (19.0) | 10  (8.3) | 5  (5.0) | 56  (36.8) | **<0.001** | 4.0  (0.7) | 3.5  (0.7) | 4.0  (0.7) | 4.0  (0.7) | 0.205 |
| *Specialist surgeon* | 50 (13.4) | 19 (15.7) | 8  (8.0) | 23  (15.1) | 0.178 | 49 (13.1) | 14 (11.5) | 15 (15.0) | 20  (13.1) | 0.754 | 3.2  (1.1) | 3.3  (0.8) | 3.1  (1.1) | 3.0  (1.3) | 0.318 |
| *Genetic counsellor* | 49  (13.3) | 10  (8.3) | 10 (10.0) | 29  (19.1) | **0.018** | 93 (24.9) | 17 (14.0) | 19 (19.0) | 57  (37.5) | **<0.001** | 3.4  (1.2) | 3.2  (1.3) | 3.3  (1.3) | 3.5  (1.2) | 0.629 |
| *Social worker* | 37  (9.9) | 9  (7.4) | 13 (13.0) | 15  (9.8) | 0.387 | 51 (13.7) | 12  (9.9) | 4  (4.0) | 35  (23.0) | **<0.001** | 3.1  (1.1) | 3.0  (1.1) | 3.6  (0.6) | 3.1  (1.1) | 0.753 |
| *Chiropractor* | 33  (8.8) | 3  (2.5) | 12 (12.0) | 18  (11.8) | **0.011** | 36  (9.6) | 4  (3.3) | 6  (6.0) | 26  (17.1) | **<0.001** | 3.6  (0.9) | 3.7  (0.9) | 4.2  (0.4) | 3.5  (1.0) | 0.603 |
| *Osteopath* | 29  (7.8) | 4  (3.3) | 8  (8.0) | 17  (11.2) | **0.054** | 45 (12.1) | 7  (5.7) | 11 (11.0) | 27  (17.7) | **0.010** | 3.3  (0.9) | 3.1  (1.1) | 3.4  (0.9) | 3.4  (0.9) | **0.050** |
| *Massage therapist* | 29  (7.8) | 4  (3.3) | 5  (5.0) | 20  (13.1) | **0.005** | 37 (9.92) | 8  (6.6) | 5  (5.0) | 24  (15.8) | **0.007** | 3.6  (1.0) | 3.4  (0.9) | 4.0  (0.7) | 3.6  (1.1) | 0.783 |
| *Exercise physiologist* | 25  (6.7) | 3  (2.5) | 5  (5.0) | 17  (11.2) | **0.012** | 49 (13.1) | 10  (8.3) | 10 (10.0) | 29  (19.1) | **0.018** | 3.2  (1.2) | 3.0  (1.4) | 3.6  (0.7) | 3.2  (1.2) | 0.659 |
| *Physiotherapist* | 22  (5.9) | 6  (5.0) | 4  (4.0) | 12  (7.9) | 0.380 | 43 (11.5) | 14 (11.5) | 5  (5.0) | 24  (15.8) | **0.032** | 3.5  (0.8) | 3.7  (0.5) | 3.6  (0.9) | 3.4  (0.8) | 0.721 |
| *Other health professionals* | 5  (1.3) | 0  (0.0) | 0  (0.0) | 5  (3.3) | **0.025** | 7  (1.9) | 0  (0.0) | 0  (0.0) | 7  (4.6) | **0.006** | 3.8  (1.6) | - | - | 3.8  (1.6) | - |

* *Response options (1 to 5) included: Not all able (1), Somewhat unable (2), Neither able or unable (3), Somewhat able (4), Extremely able (5)*
